# Supplementary material for: Genetic Architecture and Fitness of Bacterial Interspecies Hybrids
Source: PubMed Central journal article supplement — Mol Biol Evol. 2020 Nov 28;38(4):1472–81. doi: 10.1093/molbev/msaa307 (PMC8042766; doi:10.1093/molbev/msaa307), 2020-11-28
Supplement: msaa307_supplementary_data.pdf [file msaa307_supplementary_data.pdf]

## Supplementary Material

### Genetic architecture and fitness of bacterial inter-species hybrids

Katrin Bartke,<sup>1</sup> Linnéa Garoff,<sup>1</sup> Douglas L. Huseby,<sup>1</sup> Gerrit Brandis,<sup>1</sup> and Diarmaid  
Hughes<sup>\*,1</sup>

<sup>1</sup> Department of Medical Biochemistry and Microbiology, Uppsala University,  
Uppsala, Sweden

\* **Corresponding author:** E-mail: [diarmaid.hughes@imbim.uu.se](mailto:diarmaid.hughes@imbim.uu.se)

**Key words:** Conjugation, experimental evolution, *Escherichia coli*, *Salmonella*  
Typhimurium, relative fitness, recombination

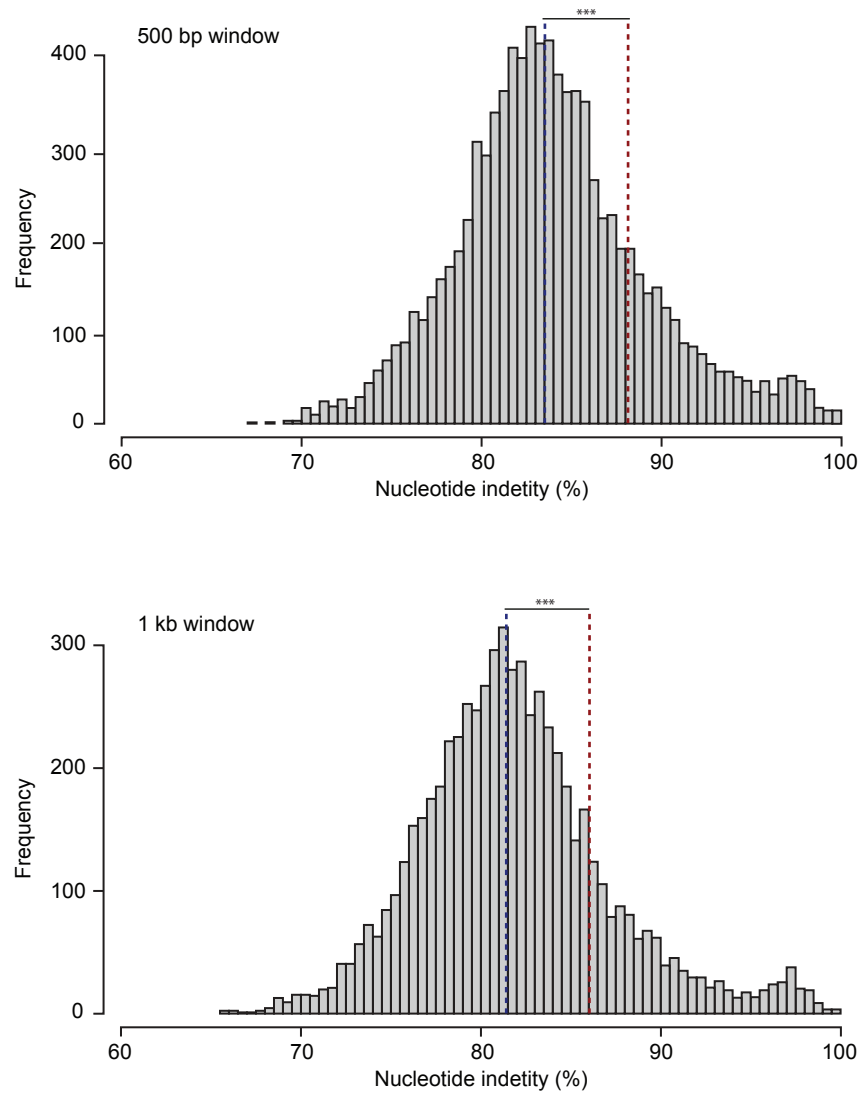

**Supplementary FIG S1.** Comparison of *E. coli* and *S. Typhimurium* nucleotide identity. Average nucleotide identity between the chromosomes of the *E. coli* donor and *S. Typhimurium* recipient with a sliding 500 bp (top) and 1 kb (bottom) window. Dotted lines indicate average nucleotide identity of the two chromosomes (blue) and the recombination junctions (red). \*\*\*P-value <0.001 (two-tailed Kolmogorov-Smirnov Test).

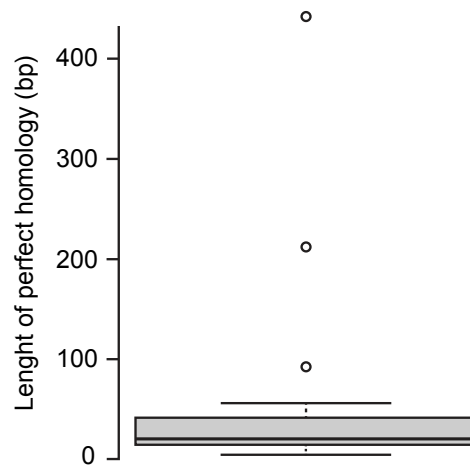

**Supplementary FIG S2.** Length of perfect sequence homology at the recombination junction.

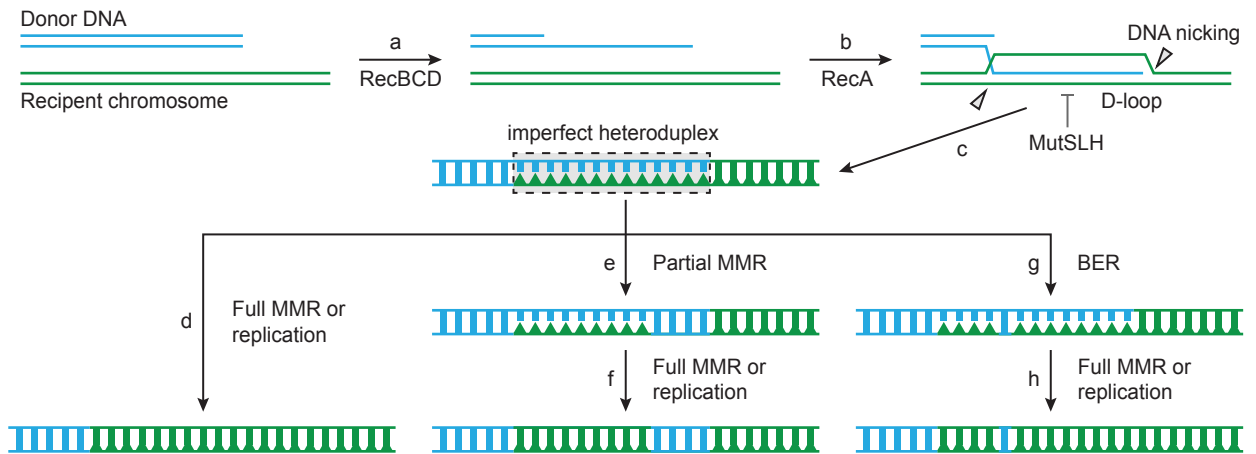

**Supplementary FIG S3.** Mechanism of hybrid chromosome formation. Donor DNA that has been conjugated into the recipient cell is processed by RecBCD (a). The processed DNA binds in a RecA-dependent manner to the homologous region on the recipient chromosome. The resulting formation of an imperfect heteroduplex DNA segment is strongly inhibited by the MusSLH mismatch repair system (b). Junction resolution leads to the formation of a hybrid chromosome that with an imperfect heteroduplex DNA segment (c). Mismatches within the heteroduplex can be repaired by the mismatch repair system (MMR) or maintained until the next round of replication resulting in a clear transition between donor and recipient DNA (d). Partial repair of the heteroduplex by the MMR (e) or repair of single mismatches by the base excision repair system (BER) (g) can lead to the formation of a transition that alternates between donor and recipient DNA (f, h).

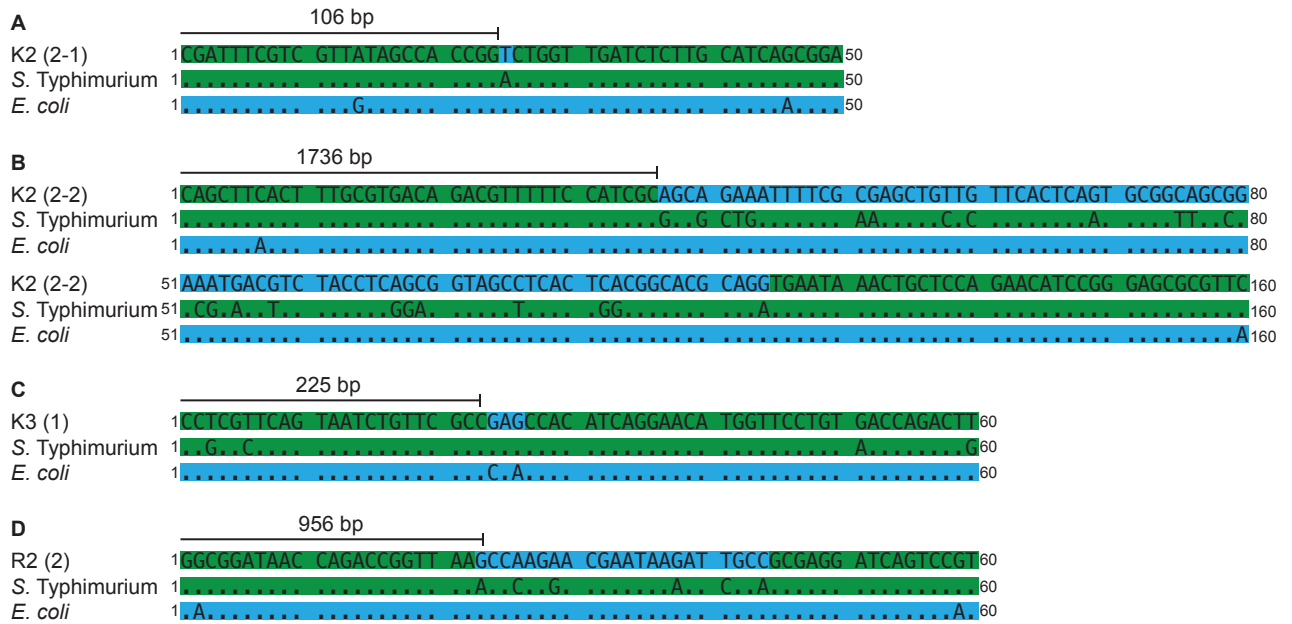

**Supplementary FIG S4.** Nucleotide sequence alignment of the recombination junctions with alternating transitions. Green colour indicates *S. Typhimurium* and blue colour indicates *E. coli* sequence based on SNPs between the two species. The number above the alignment displays the distance to the closest recombination junction. The chromosomal locations of alternating transitions are shown in supplementary fig. S5.

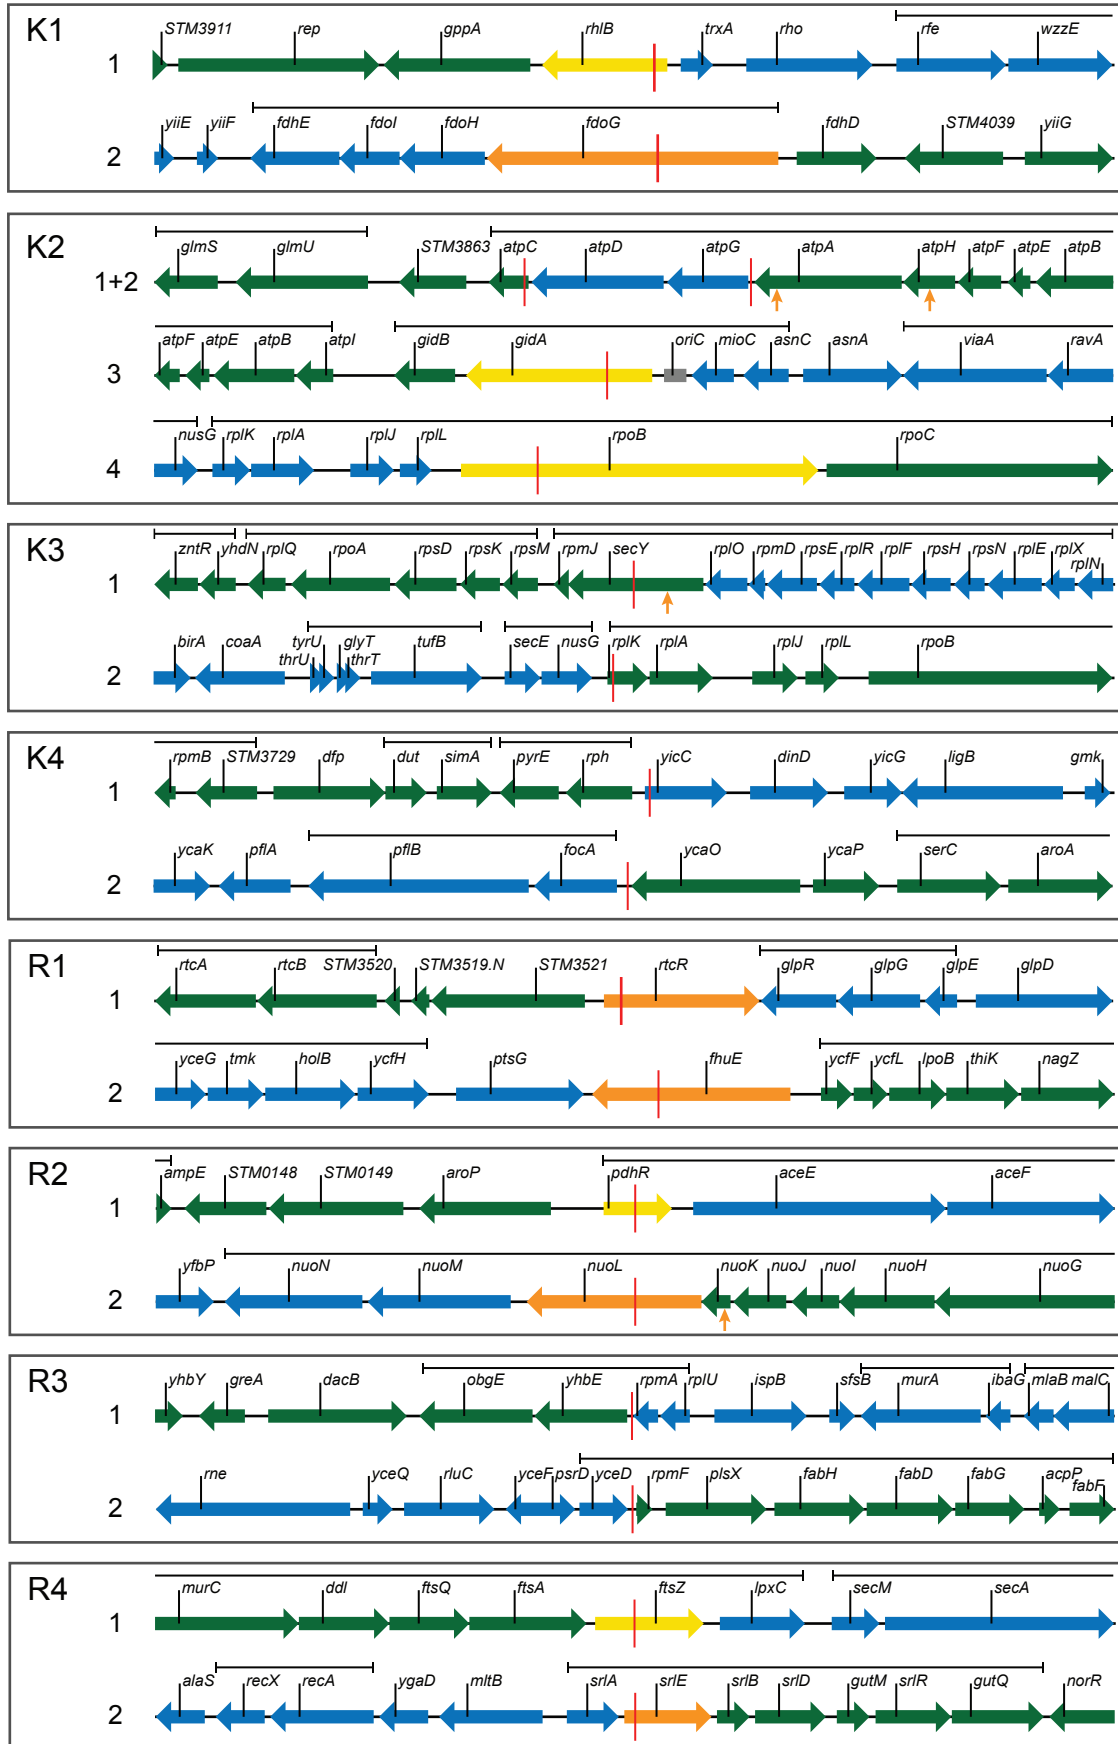

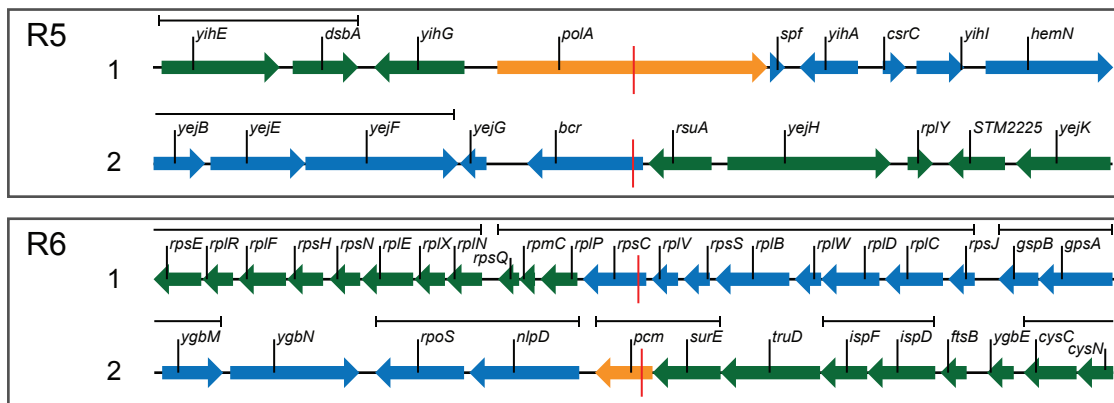

**Supplementary FIG S5.** Analysis of recombination junctions. Chromosome structure in a 10 kb window around each recombination junction. *S. typhimurium* genes are shown in green and *E. coli* genes are shown in blue. The red line indicates the first nucleotide that does not match the *S. typhimurium* sequence. Genes with a hybrid coding sequence are coloured based on their protein identity. Hybrid genes that encode proteins identical to the protein in either species are shown in green or blue, genes with a protein identity >99% to either species are shown in yellow, and genes with a protein identity <99% to either species are in orange. Orange arrows below genes indicate junctions with alternating transitions (see fig S4). Operon membership as indicated by the EcoCyc database (Keseler, et al. 2017) is indicated above the genes.

**Supplementary Table S1.** Frequency of selected colonies as a function of conjugation parameters.

| <b>Donor</b> | <b>Recipient</b> | <b>Time / h</b> | <b>Selection</b> | <b>Frequency</b>      |
|--------------|------------------|-----------------|------------------|-----------------------|
| CH6459       | TH6767           | 3               | TET + SPT        | $8.1 \cdot 10^{-7}$   |
| CH6459       | TH6767           | 6               | TET + SPT        | $4.6 \cdot 10^{-6}$   |
| CH6459       | TH6767           | 12              | TET + SPT        | $9.6 \cdot 10^{-6}$   |
| CH6941       | TH10684          | 3               | KAN + CHL        | $2.8 \cdot 10^{-7}$   |
| CH6941       | TH10684          | 6               | KAN + CHL        | $2.8 \cdot 10^{-6}$   |
| CH6941       | TH10684          | 12              | KAN + CHL        | $9.5 \cdot 10^{-6}$   |
| CH6941       | TH10684          | 3               | RIF + CHL        | $< 3.0 \cdot 10^{-9}$ |
| CH6941       | TH10684          | 6               | RIF + CHL        | $1.8 \cdot 10^{-8}$   |
| CH6941       | TH10684          | 12              | RIF + CHL        | $8.6 \cdot 10^{-8}$   |



Supplementary Table S2. Strain list.

| Strain         | Species               | Genotype & comments                                                                                                                                                                                                           | Source                            |
|----------------|-----------------------|-------------------------------------------------------------------------------------------------------------------------------------------------------------------------------------------------------------------------------|-----------------------------------|
| TH6767         | <i>S. Typhimurium</i> | <i>metA22 metE551 trpD2 ilv-452 leu- pro-</i><br>(leaky) <i>hsdLT6 hsdSA29 hsdB strA120</i><br><i>eutR&lt;&gt;spt</i>                                                                                                         | TT24693<br>John Roth,<br>UC Davis |
| TH10684        | <i>S. Typhimurium</i> | <i>metA22 metE551 trpD2 ilv-452 leu- pro-</i><br>(leaky) <i>hsdLT6 hsdSA29 hsdB strA120</i><br><i>eutR&lt;&gt;spt ydgI&lt;&gt;cat</i>                                                                                         | This study                        |
| CH6459         | <i>E. coli</i>        | HfrKL14(PO68) transfers CW<br>F inserted at IS2 next to <i>yqiG</i><br><i>relA1 thiE1 spoT1 ilvD691::Tn10</i>                                                                                                                 | BW6159<br>Barry<br>Wanner,<br>HMS |
| CH6941         | <i>E. coli</i>        | HfrKL14(PO68) transfers CW<br>F inserted at IS2 next to <i>yqiG</i><br><i>relA1 thiE1 spoT1 ilvD691::Tn10</i><br><i>yiiF&lt;&gt;kan ymdA&lt;&gt;rif queE&lt;&gt;gen</i>                                                       | This study                        |
| T1<br>(CH7196) | Hybrid                | CH6459 <i>fis</i> nt138 - <i>ilvC</i> nt1401<br>replaces<br>TH6767 <i>fis</i> nt138 - <i>ilvC</i> nt1401                                                                                                                      | This study                        |
| T2<br>(CH7194) | Hybrid                | CH6459 <i>sspA</i> nt120 - <i>engB</i> nt-26<br>replaces<br>TH6767 <i>sspA</i> nt120 - <i>engB</i> nt-26                                                                                                                      | This study                        |
| T3<br>(CH7195) | Hybrid                | CH6459 <i>gltB</i> nt2481 – <i>glnA</i> nt1317<br>replaces<br>TH6767 <i>gltB</i> nt2481 – <i>glnA</i> nt1317                                                                                                                  | This study                        |
| T4<br>(CH7193) | Hybrid                | CH6459 <i>infB</i> nt2535 – <i>ulaE</i> nt705<br>replaces<br>TH6767 <i>infB</i> nt2535 – <i>ulaE</i> nt705                                                                                                                    | This study                        |
| K1<br>(CH7200) | Hybrid                | CH6941 <i>rhlB</i> nt150 - <i>fdoG</i> nt1443<br>replaces<br>TH10684 <i>rhlB</i> nt150 - <i>fdoG</i> nt1443                                                                                                                   | This study                        |
| K2<br>(CH7198) | Hybrid                | CH6941 <i>atpC</i> nt54 - <i>atpG</i> nt-21<br>replaces<br>TH10684 <i>atpC</i> nt54 - <i>atpG</i> nt-21<br>AND<br>CH6941 <i>gidA</i> nt384 - <i>rpoB</i> nt1326<br>replaces<br>TH10684 <i>gidA</i> nt384 - <i>rpoB</i> nt1326 | This study                        |

**Supplementary Table S2.** Continued.

|                |        |                                                                                                             |            |
|----------------|--------|-------------------------------------------------------------------------------------------------------------|------------|
| K3<br>(CH7201) | Hybrid | CH6941 <i>secY</i> nt747 - <i>rplK</i> nt54<br>replaces<br>TH10684 <i>secY</i> nt747 - <i>rplK</i> nt54     | This study |
| K4<br>(CH7206) | Hybrid | CH6941 <i>yicC</i> nt54 - <i>focA</i> nt-146<br>replaces<br>TH10684 <i>yicC</i> nt54 - <i>focA</i> nt-146   | This study |
| R1<br>(CH7210) | Hybrid | CH6941 <i>rtcR</i> nt279 - <i>fhuE</i> nt1437<br>replaces<br>TH10684 <i>rtcR</i> nt279 - <i>fhuE</i> nt1422 | This study |
| R2<br>(CH7207) | Hybrid | CH6941 <i>pdhR</i> nt363 - <i>nuoL</i> nt732<br>replaces<br>TH10684 <i>pdhR</i> nt363 - <i>nuoL</i> nt732   | This study |
| R3<br>(CH7211) | Hybrid | CH6941 <i>yhbE</i> nt-87 - <i>rpmF</i> nt-31<br>replaces<br>TH10684 <i>yhbE</i> nt-91 - <i>rpmF</i> nt-31   | This study |
| R4<br>(CH7203) | Hybrid | CH6941 <i>ftsZ</i> nt369 - <i>srlE</i> nt108<br>replaces<br>TH10684 <i>ftsZ</i> nt369 - <i>srlE</i> nt108   | This study |
| R5<br>(CH7208) | Hybrid | CH6941 <i>polA</i> nt1362 - <i>bcr</i> nt90<br>replaces<br>TH10684 <i>polA</i> nt1362 - <i>bcr</i> nt90     | This study |
| R6<br>(CH7202) | Hybrid | CH6941 <i>rpsC</i> nt153 - <i>pcm</i> nt159<br>replaces<br>TH10684 <i>rpsC</i> nt153 - <i>pcm</i> nt159     | This study |
| CH7231         | Hybrid | Evolved T1-1 <sup>a</sup>                                                                                   | This study |
| CH7232         | Hybrid | Evolved T1-2 <sup>a</sup>                                                                                   | This study |
| CH7233         | Hybrid | Evolved T1-3 <sup>a</sup>                                                                                   | This study |
| CH7234         | Hybrid | Evolved T1-4 <sup>a</sup>                                                                                   | This study |
| CH7236         | Hybrid | Evolved T1-5 <sup>a</sup>                                                                                   | This study |
| CH7237         | Hybrid | Evolved T1-6 <sup>a</sup>                                                                                   | This study |
| CH7218         | Hybrid | Evolved T2-1 <sup>a</sup>                                                                                   | This study |
| CH7219         | Hybrid | Evolved T2-2 <sup>a</sup>                                                                                   | This study |
| CH7220         | Hybrid | Evolved T2-3 <sup>a</sup>                                                                                   | This study |

**Supplementary Table S2.** Continued.

|                |        |                                                                                                             |            |
|----------------|--------|-------------------------------------------------------------------------------------------------------------|------------|
| K3<br>(CH7201) | Hybrid | CH6941 <i>secY</i> nt747 - <i>rplK</i> nt54<br>replaces<br>TH10684 <i>secY</i> nt747 - <i>rplK</i> nt54     | This study |
| K4<br>(CH7206) | Hybrid | CH6941 <i>yicC</i> nt54 - <i>focA</i> nt-146<br>replaces<br>TH10684 <i>yicC</i> nt54 - <i>focA</i> nt-146   | This study |
| R1<br>(CH7210) | Hybrid | CH6941 <i>rtcR</i> nt279 - <i>fhuE</i> nt1437<br>replaces<br>TH10684 <i>rtcR</i> nt279 - <i>fhuE</i> nt1422 | This study |
| R2<br>(CH7207) | Hybrid | CH6941 <i>pdhR</i> nt363 - <i>nuoL</i> nt732<br>replaces<br>TH10684 <i>pdhR</i> nt363 - <i>nuoL</i> nt732   | This study |
| R3<br>(CH7211) | Hybrid | CH6941 <i>yhbE</i> nt-87 - <i>rpmF</i> nt-31<br>replaces<br>TH10684 <i>yhbE</i> nt-91 - <i>rpmF</i> nt-31   | This study |
| R4<br>(CH7203) | Hybrid | CH6941 <i>ftsZ</i> nt369 - <i>srlE</i> nt108<br>replaces<br>TH10684 <i>ftsZ</i> nt369 - <i>srlE</i> nt108   | This study |
| R5<br>(CH7208) | Hybrid | CH6941 <i>polA</i> nt1362 - <i>bcr</i> nt90<br>replaces<br>TH10684 <i>polA</i> nt1362 - <i>bcr</i> nt90     | This study |
| R6<br>(CH7202) | Hybrid | CH6941 <i>rpsC</i> nt153 - <i>pcm</i> nt159<br>replaces<br>TH10684 <i>rpsC</i> nt153 - <i>pcm</i> nt159     | This study |
| CH7231         | Hybrid | Evolved T1-1 <sup>a</sup>                                                                                   | This study |
| CH7232         | Hybrid | Evolved T1-2 <sup>a</sup>                                                                                   | This study |
| CH7233         | Hybrid | Evolved T1-3 <sup>a</sup>                                                                                   | This study |
| CH7234         | Hybrid | Evolved T1-4 <sup>a</sup>                                                                                   | This study |
| CH7236         | Hybrid | Evolved T1-5 <sup>a</sup>                                                                                   | This study |
| CH7237         | Hybrid | Evolved T1-6 <sup>a</sup>                                                                                   | This study |
| CH7218         | Hybrid | Evolved T2-1 <sup>a</sup>                                                                                   | This study |
| CH7219         | Hybrid | Evolved T2-2 <sup>a</sup>                                                                                   | This study |
| CH7220         | Hybrid | Evolved T2-3 <sup>a</sup>                                                                                   | This study |

**Supplementary Table S2.** Continued

|        |        |                           |            |
|--------|--------|---------------------------|------------|
| CH7221 | Hybrid | Evolved T2-4 <sup>a</sup> | This study |
| CH7223 | Hybrid | Evolved T2-5 <sup>a</sup> | This study |
| CH7222 | Hybrid | Evolved T2-6 <sup>a</sup> | This study |
| CH7224 | Hybrid | Evolved T3-1 <sup>a</sup> | This study |
| CH7225 | Hybrid | Evolved T3-2 <sup>a</sup> | This study |
| CH7227 | Hybrid | Evolved T3-3 <sup>a</sup> | This study |
| CH7228 | Hybrid | Evolved T3-4 <sup>a</sup> | This study |
| CH7226 | Hybrid | Evolved T3-5 <sup>a</sup> | This study |
| CH7212 | Hybrid | Evolved T4-1 <sup>a</sup> | This study |
| CH7213 | Hybrid | Evolved T4-2 <sup>a</sup> | This study |
| CH7230 | Hybrid | Evolved T4-3 <sup>a</sup> | This study |
| CH7214 | Hybrid | Evolved T4-4 <sup>a</sup> | This study |
| CH7215 | Hybrid | Evolved T4-5 <sup>a</sup> | This study |
| CH7216 | Hybrid | Evolved T4-6 <sup>a</sup> | This study |
| CH7217 | Hybrid | Evolved T4-7 <sup>a</sup> | This study |
| CH9713 | Hybrid | T1, CH7196 $\Delta relA$  | This study |
| CH9716 | Hybrid | T2, CH7194 $\Delta relA$  | This study |
| CH9714 | Hybrid | T3, CH7195 $\Delta relA$  | This study |
| CH9715 | Hybrid | T4, CH7193 $\Delta relA$  | This study |

<sup>a</sup> Full list of mutations acquired during experimental evolution in supplementary table S5.

**Supplementary Table S3.** Relative growth rates of hybrid strains. <sup>a</sup>

| <b>Strain</b> | <b>Relative growth rate <math>\pm</math> SD in LB</b> | <b>Relative growth rate <math>\pm</math> SD in M9</b> |
|---------------|-------------------------------------------------------|-------------------------------------------------------|
| T1 (CH7196)   | 0.66 $\pm$ 0.01                                       | 0.45 $\pm$ 0.09                                       |
| T2 (CH7194)   | 0.75 $\pm$ 0.01                                       | 0.41 $\pm$ 0.03                                       |
| T3 (CH7195)   | 0.75 $\pm$ 0.02                                       | 0.45 $\pm$ 0.01                                       |
| T4 (CH7193)   | 0.83 $\pm$ 0.02                                       | 0.29 $\pm$ 0.02                                       |
| K1 (CH7200)   | 0.95 $\pm$ 0.02                                       | 0.98 $\pm$ 0.08                                       |
| K2 (CH7198)   | 0.82 $\pm$ 0.01                                       | 0.89 $\pm$ 0.04                                       |
| K3 (CH7201)   | 0.73 $\pm$ 0.02                                       | 0.60 $\pm$ 0.03                                       |
| K4 (CH7206)   | 0.85 $\pm$ 0.02                                       | 0.72 $\pm$ 0.05                                       |
| R1 (CH7210)   | 0.82 $\pm$ 0.02                                       | 0.87 $\pm$ 0.01                                       |
| R2 (CH7207)   | 1.14 $\pm$ 0.02                                       | 1.33 $\pm$ 0.09                                       |
| R3 (CH7211)   | 0.84 $\pm$ 0.01                                       | 0.78 $\pm$ 0.03                                       |
| R4 (CH7203)   | 1.17 $\pm$ 0.06                                       | 1.20 $\pm$ 0.10                                       |
| R5 (CH7208)   | 1.12 $\pm$ 0.05                                       | 1.22 $\pm$ 0.05                                       |
| R6 (CH7202)   | 1.09 $\pm$ 0.05                                       | 1.03 $\pm$ 0.14                                       |

<sup>a</sup> Exponential growth rate  $\pm$  standard deviation relative to TH6767.

**Supplementary Table S4.** Relative growth rates of evolved hybrid strains. <sup>a</sup>

| <b>Strain</b> | <b>Relative growth rate <math>\pm</math> SD <sup>b</sup></b> |
|---------------|--------------------------------------------------------------|
| T1 (CH7196)   | 0.66 $\pm$ 0.01                                              |
| T1-1 (CH7231) | 0.95 $\pm$ 0.02 ***                                          |
| T1-2 (CH7232) | 0.89 $\pm$ 0.01 ***                                          |
| T1-3 (CH7233) | 0.91 $\pm$ 0.02 ***                                          |
| T1-4 (CH7234) | 0.89 $\pm$ 0.05 ***                                          |
| T1-5 (CH7236) | 0.88 $\pm$ 0.01 ***                                          |
| T1-6 (CH7237) | 0.89 $\pm$ 0.02 ***                                          |
| T2 (CH7194)   | 0.75 $\pm$ 0.01                                              |
| T2-1 (CH7218) | 0.96 $\pm$ 0.03 ***                                          |
| T2-2 (CH7219) | 0.80 $\pm$ 0.00 ***                                          |
| T2-3 (CH7220) | 1.01 $\pm$ 0.03 ***                                          |
| T2-4 (CH7221) | 0.91 $\pm$ 0.03 ***                                          |
| T2-5 (CH7223) | 0.91 $\pm$ 0.01 ***                                          |
| T2-6 (CH7222) | 0.93 $\pm$ 0.01 ***                                          |
| T3 (CH7195)   | 0.75 $\pm$ 0.02                                              |
| T3-1 (CH7224) | 0.91 $\pm$ 0.02 ***                                          |
| T3-2 (CH7225) | 0.86 $\pm$ 0.02 ***                                          |
| T3-3 (CH7227) | 0.89 $\pm$ 0.02 ***                                          |
| T3-4 (CH7228) | 0.88 $\pm$ 0.01 ***                                          |
| T3-5 (CH7226) | 0.90 $\pm$ 0.02 ***                                          |
| T4 (CH7193)   | 0.83 $\pm$ 0.02                                              |
| T4-1 (CH7212) | 0.85 $\pm$ 0.01 n.s.                                         |
| T4-2 (CH7213) | 0.91 $\pm$ 0.06 *                                            |
| T4-3 (CH7230) | 0.85 $\pm$ 0.04 n.s.                                         |
| T4-4 (CH7214) | 0.80 $\pm$ 0.01 *                                            |
| T4-5 (CH7215) | 0.86 $\pm$ 0.05 n.s.                                         |
| T4-6 (CH7216) | 0.95 $\pm$ 0.02 ***                                          |
| T4-7 (CH7217) | 0.91 $\pm$ 0.03 **                                           |

<sup>a</sup> Exponential growth rate  $\pm$  standard deviation relative to TH6767.

<sup>b</sup> n.s.: non-significant, \*: P<0.05, \*\*: P<0.01, \*\*\*: P<0.001 (two-tailed t-test compared with unevolved parental strain)

**Supplementary Table S5.** Full list of acquired mutations in evolved hybrids.**T1-1 (CH7231)**

|                                            |                            |                               |
|--------------------------------------------|----------------------------|-------------------------------|
| <i>relA</i> nt211 ins IS10 <sup>a</sup>    | <i>hycD</i> nt403 ins IS10 | <i>STM0530</i> Ala195Val      |
| <i>STM2503</i> nt728 ins IS10 <sup>b</sup> | <i>mdlA</i> Gly461Ser      | <i>STM0710</i> ntG468A        |
| <i>mutS</i> nt2290 ins IS10 <sup>d</sup>   | <i>menE</i> ntG927A        | <i>STM3022</i> nt576 ins IS10 |
| <i>glpT</i> Tyr406fs <sup>e</sup>          | <i>mig-3</i> Gly134fs      | <i>STM3350</i> Glu202fs       |
| <i>nudE</i> Pro54Ser <sup>e</sup>          | <i>mukB</i> Asp234Gly      | <i>sucA</i> Thr307Ala         |
| <i>treB</i> nt543 ins T <sup>e</sup>       | <i>oppA</i> ntT-233C       | <i>thrA</i> Cys280fs          |
| <i>aldB</i> ntG-79A                        | <i>pgi</i> His303Tyr       | <i>ugpA</i> nt130 ins IS10    |
| <i>argA</i> ntT709C                        | <i>phnT</i> Val68Ala       | <i>uup</i> Asn174Ser          |
| <i>bcfD</i> Ser259Gly                      | <i>phoQ</i> Arg291His      | <i>vacB</i> ntC1932T          |
| <i>carB</i> Thr740Ala                      | <i>proV</i> nt449 ins IS10 | <i>yacC</i> ntC-98T           |
| <i>cbiO</i> Lys143fs                       | <i>queF</i> Asp262Gly      | <i>ybbO</i> Leu117Pro         |
| <i>cfa</i> nt292 ins IS10                  | <i>rhaB</i> Tyr163Cys      | <i>yeaG</i> Gly115fs          |
| <i>cysQ</i> ntT474C                        | <i>rpoB</i> Ser621Pro      | <i>yebE</i> Asp204Gly         |
| <i>dmsA</i> nt1017 ins IS10                | <i>ssaJ</i> Ser62Pro       | <i>yeeO</i> Ala17Thr          |
| <i>dnaA</i> Arg398Cys                      | <i>stdB</i> Leu819Phe      | <i>ygiF</i> Leu78fs           |
| <i>envE</i> nt-244 ins G                   | <i>STM0042</i> ntC36T      | <i>yliJ</i> Leu52Val          |
| <i>gst</i> ΔntA-51                         | <i>STM0281</i> Thr328Ala   | <i>yncC</i> nt161 ins IS10    |
| <i>hpaX</i> ntC1128T                       | <i>STM0356</i> ntA-67G     |                               |

**T1-2 (CH7232)**

|                                            |                                      |                            |
|--------------------------------------------|--------------------------------------|----------------------------|
| <i>relA</i> nt184 ins IS10 <sup>a</sup>    | <i>treB</i> nt543 ins T <sup>e</sup> | <i>yceE</i> nt658 ins IS10 |
| <i>yegE</i> nt1913 ins IS10 <sup>b</sup>   | <i>cysA</i> nt158 ins IS10           | <i>yceO</i> nt-4 ins IS10  |
| <i>STM0030</i> nt721 ins IS10 <sup>c</sup> | <i>sopE2</i> nt-43 ins IS10          | <i>yfbG</i> Phe537Val      |
| <i>glpT</i> nt854 ins IS10 <sup>e</sup>    | <i>ybdR</i> nt339 ins IS10           | <i>yjjY</i> nt22 ins IS10  |

**T1-3 (CH7233)**

|                                          |                               |                                |
|------------------------------------------|-------------------------------|--------------------------------|
| <i>relA</i> Val325Met <sup>a</sup>       | <i>msbA</i> ntA651G           | <i>STM3083</i> nt1197 ins IS10 |
| <i>mutS</i> nt1154 ins IS10 <sup>d</sup> | <i>nifJ</i> ntG3411A          | <i>STM3127</i> Ala24fs         |
| <i>arcB</i> Thr469Ile <sup>e</sup>       | <i>oat</i> Glu38Lys           | <i>STM3133</i> Ala270fs        |
| <i>glpT</i> His147Arg <sup>e</sup>       | <i>pheR</i> A-75G             | <i>STM4213</i> Val9Ala         |
| <i>treB</i> nt543 ins T <sup>e</sup>     | <i>rnd</i> ntG798A            | <i>STM4495</i> Val122Met       |
| <i>bcsA</i> ntG2052A                     | <i>STM0054</i> Arg258His      | <i>yajR</i> Ala385Thr          |
| <i>bcsB</i> ntG-4A                       | <i>STM0062</i> Asp122Gly      | <i>yefQ</i> downstream nt25 ΔT |
| <i>cysJ</i> Tyr270His                    | <i>STM0306</i> nt703 ins IS10 | <i>ydcP</i> Asp94Gly           |
| <i>hisA</i> Ile223Thr                    | <i>STM0716</i> Leu74fs        | <i>yeeA</i> ntG-102A           |
| <i>kdsA</i> ntG519A                      | <i>STM1472</i> T-143C         | <i>ynfC</i> Val107fs           |
| <i>metG</i> ntG1392A                     | <i>STM1786</i> nt-43 ins C    | <i>ytfM</i> Ser199Leu          |
| <i>mpl</i> Leu16fs                       | <i>STM2006</i> nt-166 ins G   |                                |

**T1-4 (CH7234)**

|                                          |                                          |                             |
|------------------------------------------|------------------------------------------|-----------------------------|
| <i>relA</i> nt 211 ins IS10 <sup>a</sup> | <i>glpT</i> nt 207 ins IS10 <sup>e</sup> | <i>wecH</i> nt599 ins IS10  |
| <i>arcB</i> nt 34 ins IS10 <sup>e</sup>  | <i>rfbK</i> nt899 ins IS10               | <i>yjeJ</i> nt-125 ins IS10 |
| <i>csgC</i> nt114 ins IS10 <sup>e</sup>  | <i>stcC</i> nt 1515 ins IS10             | <i>yjeJ</i> nt837 ins IS10  |
| <i>fljA</i> nt407 ins IS10 <sup>e</sup>  | <i>tdcE</i> nt 344 ins IS10              |                             |

**T1-5 (CH7236)**

|                                         |                                        |                               |
|-----------------------------------------|----------------------------------------|-------------------------------|
| <i>relA</i> nt211 ins IS10 <sup>a</sup> | <i>treB</i> nt545 ins C <sup>e</sup>   | <i>STM0893</i> nt350 ins IS10 |
| <i>arcB</i> Ala69Val <sup>e</sup>       | <i>STM0335</i> downstream nt3 ins IS10 | <i>yehZ</i> nt308 ins IS10    |
| <i>glpT</i> nt149 ins IS10 <sup>e</sup> |                                        |                               |

**Supplementary Table S5. Continued.****T1-6 (CH7237)**

*relA* nt381 ins IS10<sup>a</sup>  
*mutL* nt365 ins IS10<sup>d</sup>  
*arcB* Thr267Ala<sup>e</sup>  
*glpT* nt474 ins IS10<sup>e</sup>  
*treB* nt543 ins T<sup>e</sup>  
*adiY* nt433 ins IS10  
*ampG* Ser123Pro  
*araB* Gly281Ser  
*aspV* downstream nt39 ins A  
*cypA* ntC-230T  
*cysN* Val235Ala  
*dmsA* Asp450Asn  
*eutG* Asn299Ser  
*gltJ* ntC480T  
*gspE* Gly359Asp

*hypF* Cys109Arg  
*ilvI* ntA-85G  
*lpp* nt-166 ins G  
*osmY* nt-136 ins IS10  
*pagO* Pro63Ser  
*pduT* nt142 ins IS10  
*rbsK* ntA-71G  
*rhaT* ntA306G  
*rhlB* ntC564T  
*rnc* ntT-50C  
*rumA* Ala212Val  
STM0277 nt32 ins IS10  
STM1188 nt434 ins IS10  
STM1260 Val28fs  
STM1441 Val153Ala

STM1586 Pro281Leu  
STM1849 ntG342A  
STM2400 nt239 ins IS10  
STM2503 ntT-58C  
STM3031 ntA-556G  
STM3251 Asn87Ser  
STM3334 ntC969T  
*syd* ntC375T  
*ybdN* Ser135fs  
*yeeO* Thr367Ala  
*yfbQ* nt-356 ins C  
*ygaA* Val386Ala  
*yhgA* Arg278His  
*yjgB* ntG-58A

**T2-1 (CH7218)**

*relA* Gln246stop<sup>a</sup>  
STM0551 Met70Val<sup>b</sup>  
*mutS* nt1154 ins IS10<sup>d</sup>  
*fimW* ntA-111G<sup>e</sup>  
*glpT* Ser70Pro<sup>e</sup>  
*ompF* nt744 ins IS10<sup>e</sup>  
*treB* nt543 ins T<sup>e</sup>  
*amtB* ntA1191G  
*artQ* Gly69Ser  
*asnT* ntT65C  
*bioA* ntG426A  
*fepG* Ala136Thr  
*gltB* Asp296Asn  
*glxK* Arg294stop  
*guaA* ntG480A  
*hemA* Thr361Ala

*hemG* ntA81G  
*hisS* ntG168A  
*mltB* nt-47 ins IS10  
*murC* Val401Ile  
*phoB* nt-76ΔT  
*rne* downstream nt55 ins A  
*rpoA* Asp305Gly  
*sodC* nt505 ins IS10  
*solA* Ala220fs  
*stdB* Arg806Trp  
*stiA* ntC270 T  
STM0294 Ala3Thr  
STM0409 Pro94Ser  
STM04870 nt158 ins IS10  
STM1002 Gly30Glu  
STM1109 nt253 ins IS10  
STM1147 nt-3 ΔG

STM1493 ntC540T  
STM1537 ntG543A  
STM1636 Leu31Pro  
STM1755 Asp29Glu  
STM3126 Asp46fs  
STM3166.S Tyr138His  
STM4011 Arg84Pro  
STM4199 ntC459T  
STM4540.S nt342 ins IS10  
*sucD* Asn187Ser  
*tatB* Asp118Asn  
*yaiW* Met362Val  
*yecE* ntG684A  
*yejG* nt247 ins IS10  
*yfeZ* Thr136Ile  
*yhjA* Als188Thr  
*yjbH* Ser15Gly

**T2-2 (CH7219)**

*relA* nt211 ins IS10<sup>a</sup>  
*glpT* nt358 ins IS10<sup>e</sup>  
*treB* nt543 ins T<sup>e</sup>  
*dipZ* nt1192 ins IS10

*fhlA* nt940 ins IS10  
*lasT* nt-370 ins IS10  
*nfi* Ala167Glu  
*stjB* nt580 ins IS10

STM2574 nt446 ins IS10  
STM4218 nt-23 ins IS10  
STM4218 nt-31 ins IS10



**Supplementary Table S5. Continued.****T2-3 (CH7220)**

|                                          |                                  |                               |
|------------------------------------------|----------------------------------|-------------------------------|
| <i>relA</i> Tyr201Cys <sup>a</sup>       | <i>hcp</i> Gly208Ser             | <i>STM2186</i> Tyr153Cys      |
| <i>yeiE</i> ntT819C <sup>c</sup>         | <i>hemY</i> Gly335Asp            | <i>STM2240</i> Tyr247His      |
| <i>mutS</i> nt1154 ins IS10 <sup>d</sup> | <i>ilvD</i> Asn205Ser            | <i>STM2532</i> ntT4698C       |
| <i>mutM</i> Arg109Cys <sup>d</sup>       | <i>ilvG</i> Asp156Asn            | <i>STM2788</i> ntT981C        |
| <i>glpT</i> Thr306Ala <sup>e</sup>       | <i>nadC</i> Arg32His             | <i>STM4261</i> Ala1066Val     |
| <i>nudE</i> Pro142Ser <sup>e</sup>       | <i>nlpB</i> Met241Val            | <i>thrA</i> ntA1401G          |
| <i>astB</i> Ala27Val                     | <i>phnT</i> Arg168His            | <i>ttrB</i> Cys114fs          |
| <i>baeS</i> Glu456stop                   | <i>ppdB</i> Asp177Gly            | <i>vacB</i> Arg580Cys         |
| <i>crp</i> Ala85Thr                      | <i>prpR</i> ntA-99T              | <i>wcaC</i> Ser46fs           |
| <i>dacD</i> Lys4Arg                      | <i>rffH</i> ntC60T               | <i>ycbK</i> Ser131fs          |
| <i>dsbB</i> Gly61Ser                     | <i>STM0098</i> nt414 ins IS10    | <i>ydgJ</i> Trp47stop         |
| <i>dsbB</i> Met102Thr                    | <i>STM0162</i> Thr134Ala         | <i>ydiL</i> C-137T            |
| <i>envE</i> nt-244 ins G                 | <i>STM0307</i> Val26Ala          | <i>yecA</i> Pro60fs           |
| <i>envZ</i> ntT291C                      | STM1515 downstream nt260 ΔT      | <i>ygeD</i> Arg214Cys         |
| <i>eutC</i> Thr270fs                     | <i>STM1558</i> Asp135Gly         | <i>ygiE</i> downstream ntC31T |
| <i>feoB</i> ntT300C                      | <i>STM1843</i> ntC1263T          | <i>yliJ</i> ntC153T           |
| <i>fxsA</i> Ile79Val                     | <i>STM1864</i> downstream ntT91C | <i>ypfG</i> Ala120Val         |
| <i>grxA</i> nt-81 ins IS10               | <i>STM2006</i> nt-166 ins G      |                               |

**T2-4 (CH7221)**

|                                         |                            |                                    |
|-----------------------------------------|----------------------------|------------------------------------|
| <i>relA</i> nt211 ins IS10 <sup>a</sup> | <i>hycD</i> Ala218Val      | <i>sicA</i> Phe110fs               |
| <i>mutH</i> nt466 ins IS10 <sup>d</sup> | <i>hycG</i> ntT219C        | <i>STM0257</i> Leu171Pro           |
| <i>arcB</i> Thr397Met <sup>e</sup>      | <i>hypB</i> Ala147Thr      | <i>STM0520</i> Leu170fs            |
| <i>glpT</i> Ser150Leu <sup>e</sup>      | <i>mppA</i> nt946 ins IS10 | <i>STM0895</i> nt68 ins IS10       |
| <i>treB</i> nt543 ins T <sup>e</sup>    | <i>nrfA</i> Gln346Arg      | <i>STM1147</i> nt-3 ΔG             |
| <i>yjeP</i> Arg278Gln                   | <i>oafA</i> nt628 ins IS10 | <i>STM1253</i> nt-77 ins IS10      |
| <i>aroP</i> ntG1227A                    | <i>otsA</i> Asp15fs        | <i>STM2192</i> Ile136Thr           |
| <i>cadA</i> Glu361Lys                   | <i>pbpC</i> Ile62fs        | <i>STM2453</i> downstream nt46 ΔGC |
| <i>cpsG</i> Gln148stop                  | <i>ratB</i> ntG5682A       | <i>STM4076</i> nt560 ins IS10      |
| <i>cysA</i> Phe133Ser                   | <i>rfaZ</i> Met227fs       | <i>STM4495</i> Arg1081His          |
| <i>fieF</i> Ile245Thr                   | <i>shdA</i> Asp766Asn      | <i>ydeI</i> downstream nt260 ΔT    |
| <i>folB</i> Ala76Val                    | <i>hycD</i> Ala218Val      |                                    |

**T2-5 (CH7223)**

|                                         |                                         |                                        |
|-----------------------------------------|-----------------------------------------|----------------------------------------|
| <i>relA</i> nt211 ins IS10 <sup>a</sup> | <i>nudE</i> nt431 ins IS10 <sup>e</sup> | <i>STM0081</i> downstream nt3 ins IS10 |
| <i>lrhA</i> nt-53 ins IS10 <sup>c</sup> | <i>treB</i> nt543 ins T <sup>e</sup>    | <i>STM1669</i> nt1871 ins IS10         |
| <i>glpT</i> nt10 ins IS10 <sup>e</sup>  | <i>fdnH</i> nt141 ins IS10              |                                        |

**Supplementary Table S5. Continued.****T2-6 (CH7222)**

|                                         |                                     |                                      |
|-----------------------------------------|-------------------------------------|--------------------------------------|
| <i>lrhA</i> nt-53 ins IS10 <sup>c</sup> | <i>invC</i> Thr166Ile               | <i>STM1097</i> nt130 ins IS10        |
| <i>mutS</i> nt143 ins IS10 <sup>d</sup> | <i>manA</i> Ala322Thr               | <i>STM2585</i> ntΔ-504--436 ins IS10 |
| <i>glpT</i> Tyr393Cys <sup>e</sup>      | <i>ompS</i> nt143 ins IS10          | <i>wcaH</i> Ala61fs                  |
| <i>treB</i> nt543 ins T <sup>e</sup>    | <i>pheP</i> nt285 ins IS10          | <i>ybiP</i> ntC1272T                 |
| <i>ahpC</i> ntA486G                     | <i>pmrF</i> Pro111Leu               | <i>ydiN</i> nt381 ins IS10           |
| <i>allC</i> Ala253Thr                   | <i>proA</i> Val117Ala               | <i>yebA</i> nt279 ins IS10           |
| <i>citG</i> Ala98Pro                    | <i>rcsC</i> ntC2076T                | <i>yebG</i> ntT72C                   |
| <i>cstA</i> ntA2015G                    | <i>rpoA</i> Asp305Gly               | <i>yedE</i> Gly64Ser                 |
| <i>fadB</i> Met145Thr                   | <i>serU</i> ntT-2C                  | <i>yejF</i> ntG801A                  |
| <i>fumC</i> Leu433Val                   | <i>sprB</i> ntC-237T                | <i>yejG</i> nt247 ins IS10           |
| <i>gcvR</i> Asp104Asn                   | <i>stcC</i> Phe16Leu                | <i>yhbE</i> ntG914A                  |
| <i>glnA</i> nt-114 ins C                | <i>STM0201</i> downstream nt1 ins G | <i>yhbT</i> nt-11 ins IS10           |
| <i>glpA</i> Gly332Asp                   | <i>STM04610</i> nt-22 ins G         | <i>yibH</i> nt726 ins IS10           |
| <i>hdeD</i> downstream nt196 ins IS10   | <i>STM0557</i> nt858 ins IS10       | <i>yjdl</i> Ser121Asn                |
| <i>hisH</i> Tyr159Cys                   | <i>STM0560</i> ntG-29A              | <i>yjiO</i> ntC-77T                  |
| <i>hpaB</i> ntG1366A                    |                                     |                                      |

**T3-1 (CH7224)**

|                                            |                                       |                                  |
|--------------------------------------------|---------------------------------------|----------------------------------|
| <i>relA</i> nt211 ins IS10 <sup>a</sup>    | <i>gcvP</i> ntG2352A                  | <i>srfC</i> Ser143Pro            |
| <i>STM0014</i> nt557 ins IS10 <sup>c</sup> | <i>gltF</i> Ala159Thr                 | <i>stdB</i> Ala630Val            |
| <i>mutS</i> nt1154 ins IS10 <sup>d</sup>   | <i>guaB</i> Arg206Cys                 | <i>STM0266</i> Gln35fs           |
| <i>arcB</i> Ala69Val <sup>e</sup>          | <i>hisH</i> Arg86His                  | <i>STM0347</i> nt117 ins IS10    |
| <i>fliY</i> Asn106Lys <sup>e</sup>         | <i>idnO</i> Tyr190His                 | <i>STM0383</i> Ala55fs           |
| <i>glpT</i> Ala235fs <sup>e</sup>          | <i>katE</i> Pro514Leu                 | <i>STM0725</i> Ile260Val         |
| <i>treB</i> nt543 ins T <sup>e</sup>       | <i>otsA</i> Asp15fs                   | <i>STM0761</i> ntT525C           |
| <i>alaV</i> ntG-47A                        | <i>parE</i> Asp614Val                 | STM1082 Thr115Ala                |
| <i>bamA</i> ntA2307G                       | <i>pduL</i> ntG333A                   | <i>STM1656</i> downstream ntT35C |
| <i>cadA</i> Gln455Arg                      | <i>phnT</i> Gly56Glu                  | <i>STM2689</i> ntG10846A         |
| <i>ccmF</i> Ala91fs                        | <i>pmbA</i> ntC873T                   | <i>tatD</i> ntC243T              |
| <i>celF</i> nt148 ins IS10                 | <i>rbsR</i> ntC870T                   | <i>tktB</i> downstream ntG4A     |
| <i>crp</i> Ile113Thr                       | <i>rnpB</i> nt271 ins C               | <i>tus</i> ntC669T               |
| <i>csrB</i> ntT129C                        | <i>rspB</i> downstream nt133 ins IS10 | <i>uspB</i> nt-125 ΔT            |
| <i>dsbA</i> Ser147Gly                      | <i>sbcD</i> Asp205Asn                 | <i>yoaA</i> nt550 ins IS10       |
| <i>flgL</i> Ala55Val                       | <i>smf</i> Arg363Gly                  |                                  |

**T3-2 (CH7225)**

|                                          |                                |                               |
|------------------------------------------|--------------------------------|-------------------------------|
| <i>relA</i> nt804 ins IS10 <sup>a</sup>  | <i>sopA</i> nt2120 ins IS10    | <i>STM3154</i> nt370 ins IS10 |
| <i>glpT</i> nt1198 ins IS10 <sup>e</sup> | <i>stjC</i> nt136 ins IS10     | <i>STM4102</i> nt740 ins IS10 |
| <i>gspD</i> nt36 ins IS10                | <i>STM0035</i> nt53 ins IS10   | <i>ybiS</i> nt431 ins IS10    |
| <i>lasT</i> nt-365 ins IS10              | <i>STM0277</i> nt143 ins IS10  | <i>yfdH</i> nt593 ins IS10    |
| <i>rfbF</i> nt46 ins IS10                | <i>STM3026</i> nt186 ins IS10  | <i>yjbE</i> nt-415 ins IS10   |
| <i>rfbG</i> nt 857 ins IS10              | <i>STM3052</i> nt-376 ins IS10 |                               |

**Supplementary Table S5. Continued.****T3-3 (CH7227)**

|                                            |                           |                               |
|--------------------------------------------|---------------------------|-------------------------------|
| <i>relA</i> nt211 ins IS10 <sup>a</sup>    | <i>fucR</i> ntG-10A       | <i>STM1539</i> Ser159fs       |
| <i>yfeA</i> ntC1752T <sup>b</sup>          | <i>fumC</i> Ala24fs       | <i>STM1557</i> Pro45Ser       |
| <i>STM0764</i> nt165 ins IS10 <sup>c</sup> | <i>gspB</i> Val89Ala      | <i>STM1657</i> ntA516G        |
| <i>mutS</i> nt1154 ins IS10 <sup>d</sup>   | <i>hisP</i> Leu168fs      | <i>STM2239</i> Ala14fs        |
| <i>mutM</i> ntA-18G <sup>d</sup>           | <i>kbl</i> Ser285Pro      | <i>STM2529</i> Asn89fs        |
| <i>arcB</i> Ala69Val <sup>e</sup>          | <i>mltC</i> Thr291Ala     | <i>STM2816</i> Thr249Ala      |
| <i>glpT</i> Ser159Leu <sup>e</sup>         | <i>parC</i> Thr249Ala     | <i>STM3031</i> ntT-560C       |
| <i>nudE</i> Gln130stop <sup>e</sup>        | <i>pflB</i> Val476Ala     | <i>STM3220</i> Ala340Val      |
| <i>treB</i> nt543 ins T <sup>e</sup>       | <i>ratA</i> Thr239Ala     | <i>STM4208</i> Glu104Lys      |
| <i>apbA</i> Trp165stop                     | <i>rbbA</i> ntT1026C      | <i>sucC</i> ntA936G           |
| <i>argH</i> Val267Ala                      | <i>rcsA</i> nt52 ins IS10 | <i>tktB</i> Gly539Ser         |
| <i>asrC</i> Arg134His                      | <i>rfaE</i> Thr29Ala      | <i>yafS</i> Arg187fs          |
| <i>aroE</i> nt-54 ins IS10                 | <i>rfbF</i> Gly130Ser     | <i>ybdR</i> His11Arg          |
| <i>cspB</i> nt-183 ins IS10                | <i>STM0035</i> ntC180T    | <i>ycaM</i> nt1123 ins IS10   |
| <i>cobS</i> Val47fs                        | <i>STM0054</i> Glu397Lys  | <i>yeeF</i> downstream ntT27C |
| <i>corC</i> Asp284Gly                      | <i>STM0182</i> ntC483T    | <i>yejK</i> Als53Val          |
| <i>cysG</i> Asp367Gly                      | <i>STM0717</i> Pro58Ser   | <i>yidJ</i> nt1183 ins IS10   |
| <i>eutH</i> Ser44Pro                       | <i>STM0721</i> ntC102T    | <i>yjgD</i> ntC243T           |
| <i>foxA</i> Tyr481fs                       | <i>STM0867</i> Trp203Arg  | <i>yjgN</i> nt532 ins IS10    |

**T3-4 (CH7228)**

|                                         |                          |                               |
|-----------------------------------------|--------------------------|-------------------------------|
| <i>relA</i> nt211 ins IS10 <sup>a</sup> | <i>ilvD</i> Ser579fs     | <i>STM1849</i> nt478 ins IS10 |
| <i>adrA</i> Met51Val <sup>b</sup>       | <i>iscA</i> Thr75Ala     | <i>STM2007</i> Trp432stop     |
| <i>mutS</i> nt143 ins IS10 <sup>d</sup> | <i>moaD</i> Asn56Ser     | <i>STM2691</i> Leu328fs       |
| <i>glpT</i> nt45 ins IS10 <sup>e</sup>  | <i>pdxH</i> ntT520C      | <i>STM3133</i> Ala270fs       |
| <i>treB</i> nt543 ins T <sup>e</sup>    | <i>pyrD</i> Leu194Ser    | <i>trg</i> nt423 ΔT           |
| <i>caiT</i> Pro17fs                     | <i>recR</i> ntG225A      | <i>ycfU</i> ntA-135G          |
| <i>cfa</i> nt921 ins IS10               | <i>rfbU</i> Pro70Ser     | <i>yegG</i> Pro81Leu          |
| <i>cypD</i> Ala436Thr                   | <i>rpoB</i> Glu876Lys    | <i>ygjU</i> ntT-166C          |
| <i>eutB</i> ntG618A                     | <i>shdA</i> ntG5730A     | <i>yicL</i> Gly268Arg         |
| <i>fabZ</i> ntT-4C                      | <i>stfC</i> Glu740Gly    | <i>yihF</i> nt292 ins IS10    |
| <i>fadJ</i> Gly116fs                    | <i>sthB</i> Gln57fs      | <i>yrdE</i> nt82 ins IS10     |
| <i>glnK</i> Ala111Val                   | <i>STM0353</i> Glu426fs  | <i>ytfN</i> Ala362Thr         |
| <i>glbB</i> Val69Ala                    | <i>STM0433</i> Gly157Glu | <i>ytfN</i> Thr343Ala         |
| <i>ilvD</i> ntA-20G                     | <i>STM1147</i> nt-3 ΔG   |                               |

**T3-5 (CH7226)**

|                                          |                               |                               |
|------------------------------------------|-------------------------------|-------------------------------|
| <i>relA</i> nt211 ins IS10 <sup>a</sup>  | <i>pagD</i> nt-313 ins IS10   | <i>STM2208</i> nt467 ins IS10 |
| <i>glpT</i> nt-114 ins IS10 <sup>e</sup> | <i>res</i> nt1106 ins IS10    | <i>STM2235</i> nt96 ins IS10  |
| <i>nudE</i> nt343 ins IS10 <sup>e</sup>  | <i>STM0011</i> nt330 ins IS10 | <i>STM2621</i> nt190 ins IS10 |
| <i>treB</i> nt543 ins T <sup>e</sup>     | <i>STM0652</i> nt184 ins IS10 | <i>uvrY</i> nt58 ins IS10     |
| <i>adhP</i> nt62 ins IS10                | <i>STM1228</i> nt699 ins IS10 | <i>yegG</i> nt199 ins IS10    |
| <i>celF</i> nt913 ins IS10               | <i>STM1255</i> nt36 ins IS10  |                               |

**T4-1 (CH7212)**

|                                          |                                          |                               |
|------------------------------------------|------------------------------------------|-------------------------------|
| <i>relA</i> nt211 ins IS10 <sup>a</sup>  | <i>oafA</i> nt1455 ins IS10              | <i>STM0288</i> nt482 ins IS10 |
| <i>yegE</i> nt1912 ins IS10 <sup>b</sup> | <i>ompL</i> nt683 ins IS10               | <i>STM1667</i> nt337 ins IS10 |
| <i>glpT</i> nt609 ins IS10 <sup>e</sup>  | <i>rfbC</i> nt132 ins IS10               | <i>virK</i> nt463 ins IS10    |
| <i>nudE</i> nt343 ins IS10 <sup>e</sup>  | <i>ssaC</i> nt1124 ins IS10              | <i>ybjM</i> nt-70 ins IS10    |
| <i>treB</i> nt532 ins C <sup>e</sup>     | <i>ssaQ</i> nt85 ins IS10                | <i>yeeZ</i> nt-43 ins IS10    |
| <i>gip</i> nt479 ins IS10                | <i>STM0082</i> downstream nt113 ins IS10 |                               |

**Supplementary Table S5. Continued.****T4-2 (CH7213)**

|                                            |                                |                                |
|--------------------------------------------|--------------------------------|--------------------------------|
| <i>relA</i> nt211 ins IS10 <sup>a</sup>    | <i>metI</i> Ala4Val            | <i>STM2633.S</i> ntC327T       |
| <i>STM2503</i> nt-12 ins IS10 <sup>b</sup> | <i>mod</i> Asp155Val           | <i>STM2678</i> Val20Ala        |
| <i>mutS</i> nt143 ins IS10 <sup>d</sup>    | <i>pgk</i> Arg183Cys           | <i>STM2693</i> ntT-105C        |
| <i>arcB</i> Arg278Trp <sup>e</sup>         | <i>ppdC</i> ntT63C             | <i>STM4539</i> Asp268Gly       |
| <i>glpT</i> Ala380fs <sup>e</sup>          | <i>pphB</i> Gly56Glu           | <i>tctE</i> ntA744G            |
| <i>treB</i> nt543 ins T <sup>e</sup>       | <i>prpC</i> ntA561G            | <i>xylF</i> Ala56Thr           |
| <i>alaS</i> ntT1539C                       | <i>prpR</i> nt-104 ΔT          | <i>yajI</i> Thr86Ala           |
| <i>cysG</i> Phe49Leu                       | <i>pspG</i> Tyr17Ala           | <i>ybhC</i> ntT591C            |
| <i>dnaE</i> Glu313Gly                      | <i>purR</i> Arg264His          | <i>ydeA</i> ΔLeu292            |
| <i>fdrA</i> ntT1002C                       | <i>STM0029</i> ntG-101A        | <i>yegO</i> Gly936Ser          |
| <i>fepE</i> ntA840G                        | <i>STM04630</i> ntA63G         | <i>yhcO</i> downstream nt23 ΔC |
| <i>gip</i> nt479 ins IS10                  | <i>STM05680</i> nt197 ins IS10 | <i>ydF</i> Tyr20Cys            |
| <i>hilA</i> ntA1176G                       | <i>STM0719</i> Ala23Val        | <i>yjdQ</i> ntC-135T           |
| <i>idnR</i> nt423 ins IS10                 | <i>STM1147</i> nt-3 ΔG         | <i>yjeF</i> ntC756T            |
| <i>ilvI</i> ntA840G                        | <i>STM2344</i> ntC94T          |                                |

**T4-3 (CH7230)**

|                                            |                                                          |                                        |
|--------------------------------------------|----------------------------------------------------------|----------------------------------------|
| <i>relA</i> nt211 ins IS10 <sup>a</sup>    | <i>araE</i> nt41 ins IS10                                | <i>STM0149</i> nt791 ins IS10          |
| <i>lrhA</i> nt-53 ins IS10 <sup>c</sup>    | <i>frvR</i> nt1478 ins IS10                              | <i>STM0335</i> downstream nt3 ins IS10 |
| <i>STM0014</i> nt557 ins IS10 <sup>c</sup> | <i>pphA</i> nt112 ins IS10                               | <i>STM0699</i> nt69 ins IS10           |
| <i>STM0859</i> nt320 ins IS10 <sup>c</sup> | <i>prgH</i> nt494 - <i>prgK</i> nt179 ins IS10 (Δ1451nt) | <i>STM1133</i> nt173 ins IS10          |
| <i>fimC</i> nt274 ins IS10 <sup>e</sup>    | <i>rfbB</i> nt-114 ins IS10                              | <i>ydbH</i> nt2238 ins IS10            |
| <i>glpT</i> nt122 ins IS10 <sup>e</sup>    | <i>rfbF</i> nt95 ins IS10                                | <i>ydbL</i> nt169 ins IS10             |
| <i>nudE</i> nt343 ins IS10 <sup>e</sup>    | <i>sipA</i> nt224 ins IS10                               | <i>ydiF</i> nt280 ins IS10             |
| <i>treB</i> nt543 ins T <sup>e</sup>       | <i>srjJ</i> nt56 ins IS10                                | <i>yhcA</i> nt219 ins IS10             |
| <i>adiC</i> nt40 ins IS10                  | <i>ssrA</i> nt2486 ins IS10                              |                                        |

**T4-4 (CH7214)**

|                                         |                             |                                |
|-----------------------------------------|-----------------------------|--------------------------------|
| <i>glpT</i> nt413 ins IS10 <sup>e</sup> | <i>leuO</i> nt-27 ins IS10  | <i>STM0868</i> nt793 ins IS10  |
| <i>cdd</i> nt-7 ins IS10                | <i>pagO</i> nt-957 ins IS10 | <i>STM2132</i> nt127 ins IS10  |
| <i>glnX</i> ntC35T                      | <i>rfc</i> nt-28 ins IS10   | <i>STM4463</i> nt-134 ins IS10 |

**T4-5 (CH7215)**

|                                                             |                                         |                            |
|-------------------------------------------------------------|-----------------------------------------|----------------------------|
| <i>relA</i> nt211 ins IS10 <sup>a</sup>                     | <i>sseA</i> downstream nt2 ins IS10     | <i>yegS</i> nt256 ins IS10 |
| <i>glpQ</i> nt606 - <i>glpA</i> nt1062 Δ3303nt <sup>e</sup> | <i>STM0038</i> nt44 ins IS10            | <i>yehS</i> nt-3 ins IS10  |
| <i>treB</i> nt543 ins T <sup>e</sup>                        | <i>STM1865</i> downstream nt53 ins IS10 | <i>yejG</i> nt247 ins IS10 |
| <i>sbcD</i> nt334 ins IS10                                  | <i>tdcA</i> nt555 ins IS10              | <i>yfdZ</i> nt95 ins IS10  |
| <i>sopA</i> nt262 ins IS10                                  |                                         |                            |

**Supplementary Table S5. Continued.****T4-6 (CH7216)**

|                                         |                               |                            |
|-----------------------------------------|-------------------------------|----------------------------|
| <i>relA</i> nt879 ins IS10 <sup>a</sup> | <i>mglA</i> Lys315Glu         | <i>STM2923 ntC-1T</i>      |
| <i>mutS</i> nt143 ins IS10 <sup>d</sup> | <i>pduG</i> Leu186Pro         | <i>STM3079.S ntT-105C</i>  |
| <i>glpT</i> Met136fs <sup>e</sup>       | <i>pflF</i> ntA1053G          | <i>STM4417 ntC264T</i>     |
| <i>nudE</i> Phe31Leu <sup>e</sup>       | <i>prgH</i> Val323fs          | <i>STM4429 nt45 ins G</i>  |
| <i>treB</i> nt543 ins T <sup>e</sup>    | <i>proX</i> Val225Ala         | <i>thrU</i> ntC-165T       |
| <i>amtB</i> ntA-25G                     | <i>pyrB</i> nt-22 ΔA          | <i>waaA</i> Ala160Thr      |
| <i>aroE</i> nt677 ins IS10              | <i>ravA</i> nt-83 ins G       | <i>yajR</i> Phe365Leu      |
| <i>ccmA</i> Ala203fs                    | <i>rfbF</i> Pro211Leu         | <i>ybiP</i> ntC930T        |
| <i>ddlA</i> Cys138Arg                   | <i>rfc</i> nt-28 ins IS10     | <i>yciG</i> nt-209 ins C   |
| <i>envF</i> Gly187Ser                   | <i>rhIE</i> Ala409fs          | <i>yciT</i> ntG363A        |
| <i>eutS</i> Tyr80Cys                    | <i>scsB</i> Ser244Leu         | <i>ydiF</i> Arg148Cys      |
| <i>exbD</i> Thr137Ala                   | <i>shdA</i> Als52Val          | <i>yegN</i> Trp719Arg      |
| <i>ftsN</i> ntC873T                     | <i>sseC</i> nt998 ins IS10    | <i>yejG</i> nt247 ins IS10 |
| <i>gpmM</i> ntG237A                     | <i>sseJ</i> nt663 ins IS10    | <i>yfgB</i> Val123Ile      |
| <i>gpmM</i> Val415Ile                   | <i>stdA</i> Val179Ile         | <i>ygdP</i> ntG348A        |
| <i>gshA</i> ntG492A                     | <i>STM1019</i> nt247 ins IS10 | <i>ygiF</i> Leu78fs        |
| <i>gutQ</i> ntG891A                     | <i>STM1539</i> Arg279His      | <i>yhaO</i> nt589 ins IS10 |
| <i>hemF</i> Met70Ile                    | <i>STM1791</i> nt562 ins IS10 | <i>yjbD</i> ntC-243T       |
| <i>manC</i> Val166Ile                   | <i>STM1849</i> Ala813Thr      | <i>yqeF</i> Ser31Gly       |
| <i>metL</i> Glu720Gly                   | <i>STM2636</i> Asp24Gly       |                            |

**T4-7 (CH7217)**

|                                          |                                |                                 |
|------------------------------------------|--------------------------------|---------------------------------|
| <i>relA</i> Tyr228Cys <sup>a</sup>       | <i>mela</i> Asn394Ser          | <i>STM2689</i> ntT4232C         |
| <i>yfeA</i> nt695 ins IS10 <sup>b</sup>  | <i>pyrB</i> nt-22 ΔA           | <i>STM2908</i> ntG132A          |
| <i>mutL</i> Gly43Ser <sup>d</sup>        | <i>rfbM</i> Leu445fs           | <i>STM4435</i> Thr86fs          |
| <i>mutS</i> nt1154 ins IS10 <sup>d</sup> | <i>rpsA</i> Pro335Ser          | <i>STM4518</i> nt-16 ins G      |
| <i>arcB</i> Met260Ile <sup>e</sup>       | <i>ssaD</i> Ser234Asn          | <i>thrA</i> Pro787Ser           |
| <i>glpT</i> Arg27Cys <sup>e</sup>        | <i>ssaP</i> Glu26Gly           | <i>ybeU</i> Asp118Gly           |
| <i>treB</i> nt543 ins T <sup>e</sup>     | <i>STM0306</i> nt615 ins IS10  | <i>ydeI</i> downstream nt260 ΔT |
| <i>adiA</i> downstream nt2 ins IS10      | <i>STM0319</i> Thr39Ala        | <i>yedI</i> nt134 ins IS10      |
| <i>cbiT</i> Asp37Gly                     | <i>STM0564</i> nt1189 ins IS10 | <i>yfiP</i> ntG-34A             |
| <i>eda</i> ntA453G                       | <i>STM0720</i> Phe88fs         | <i>yghB</i> Gly203Arg           |
| <i>foxA</i> Asp118fs                     | <i>STM0911</i> nt416 ins IS10  | <i>ygjT</i> nt-25 ΔTT           |
| <i>gabT</i> Gly49Ser                     | <i>STM1390</i> Asn162Ser       | <i>yieL</i> Pro129Ser           |
| <i>gpmB</i> nt-9 ins A                   | <i>STM1665</i> nt655 ins IS10  | <i>ymdF</i> Asn52Asp            |
| <i>gsiA</i> Thr265Ala                    | <i>STM2372</i> nt-41 ΔC        | <i>yncC</i> nt663 ins IS10      |
| <i>leuB</i> Gly143Glu                    | <i>STM2651</i> ntT-14C         |                                 |

<sup>a</sup> Genes related to ppGpp production<sup>b</sup> Genes related to c-di-GMP production<sup>c</sup> LysR-type genes<sup>d</sup> Genes related to mutator phenotypes<sup>e</sup> Genes related to media adaptation

**Supplementary Table S6.** Number of mutations and IS10 insertions found in evolved isolates.

| Type of Mutation | Mutator genotype <sup>a</sup> |        | p-value <sup>b</sup> |
|------------------|-------------------------------|--------|----------------------|
|                  | -                             | +      |                      |
| IS10             | 12 ± 6                        | 3 ± 3  | 0.03                 |
| non-IS10         | 1 ± 1                         | 39 ± 7 | < 0.001              |

<sup>a</sup> Changes in genes related to mutator phenotypes (supplementary table S5)

<sup>b</sup> Two-tailed Mann-Whitney U-test

**Supplementary Table S7.** Mutation frequency of evolved isolates.

| <b>Mutator genotype</b> | <b>Mutation frequency</b>               | <b>p-value<sup>b</sup></b> |
|-------------------------|-----------------------------------------|----------------------------|
| <sup>a</sup>            |                                         |                            |
| +                       | $5 \cdot 10^{-8} \pm 1.4 \cdot 10^{-8}$ | 0.026                      |
| -                       | $4 \cdot 10^{-9} \pm 7.3 \cdot 10^{-9}$ |                            |

<sup>a</sup> Changes in genes related to mutator phenotypes (supplementary table S5)

<sup>b</sup> Two-tailed T-test

**Supplementary Table S8.** *relA* and *spoT* alleles present in parental strains and hybrids.

| <b>Strain</b>      | <b><i>relA</i> allele</b> | <b><i>spoT</i> allele</b> |
|--------------------|---------------------------|---------------------------|
| Recipient (TH6767) | <i>relA</i> <sup>WT</sup> | <i>spoT</i> <sup>WT</sup> |
| Donor (CH6459)     | <i>relA</i> I             | <i>spoT</i> I             |
| T1 (CH7196)        | <i>relA</i> <sup>WT</sup> | <i>spoT</i> I             |
| T2 (CH7194)        | <i>relA</i> <sup>WT</sup> | <i>spoT</i> I             |
| T3 (CH7195)        | <i>relA</i> <sup>WT</sup> | <i>spoT</i> I             |
| T4 (CH7193)        | <i>relA</i> <sup>WT</sup> | <i>spoT</i> I             |
| K1 (CH7200)        | <i>relA</i> <sup>WT</sup> | <i>spoT</i> <sup>WT</sup> |
| K2 (CH7198)        | <i>relA</i> <sup>WT</sup> | <i>spoT</i> <sup>WT</sup> |
| K3 (CH7201)        | <i>relA</i> <sup>WT</sup> | <i>spoT</i> I             |
| K4 (CH7206)        | <i>relA</i> <sup>WT</sup> | <i>spoT</i> I             |
| R1 (CH7210)        | <i>relA</i> <sup>WT</sup> | <i>spoT</i> I             |
| R2 (CH7207)        | <i>relA</i> <sup>WT</sup> | <i>spoT</i> <sup>WT</sup> |
| R3 (CH7211)        | <i>relA</i> <sup>WT</sup> | <i>spoT</i> I             |
| R4 (CH7203)        | <i>relA</i> <sup>WT</sup> | <i>spoT</i> <sup>WT</sup> |
| R5 (CH7208)        | <i>relA</i> <sup>WT</sup> | <i>spoT</i> <sup>WT</sup> |
| R6 (CH7202)        | <i>relA</i> <sup>WT</sup> | <i>spoT</i> I             |



**Supplementary Table S9.** Growth data of hybrid strains as a function of RelA activity.

| Hybrid      | Relative growth rate $\pm$ SD <sup>a, b</sup> |                                 | Relative culture density $\pm$ SD <sup>b, c</sup> |                                |
|-------------|-----------------------------------------------|---------------------------------|---------------------------------------------------|--------------------------------|
|             | <i>relA</i>                                   | $\Delta$ <i>relA</i>            | <i>relA</i>                                       | $\Delta$ <i>relA</i>           |
| T1 (CH7196) | 0.76 $\pm$ 0.03                               | 0.74 $\pm$ 0.03 <sup>n.s.</sup> | 0.79 $\pm$ 0.01                                   | 0.93 $\pm$ 0.02 <sup>***</sup> |
| T2 (CH7194) | 0.85 $\pm$ 0.03                               | 0.88 $\pm$ 0.02 <sup>n.s.</sup> | 0.77 $\pm$ 0.00                                   | 0.91 $\pm$ 0.01 <sup>***</sup> |
| T3 (CH7195) | 0.86 $\pm$ 0.02                               | 0.84 $\pm$ 0.03 <sup>n.s.</sup> | 0.78 $\pm$ 0.02                                   | 0.90 $\pm$ 0.01 <sup>***</sup> |
| T4 (CH7193) | 0.89 $\pm$ 0.04                               | 0.94 $\pm$ 0.05 <sup>n.s.</sup> | 0.89 $\pm$ 0.02                                   | 1.01 $\pm$ 0.03 <sup>***</sup> |

<sup>a</sup> Exponential growth rate  $\pm$  standard deviation relative to TH6767.

<sup>b</sup> n.s.: non-significant, \*\*\*: P<0.001 (two-sided t-test compared with isogenic strain containing *relA*)

<sup>c</sup> OD<sub>600nm</sub> after 18h of growth  $\pm$  standard deviation relative to TH6767.

**Supplementary Table S10.** Oligonucleotides used in the study.

| <b>Name</b>   | <b>Sequence 5' → 3'</b>                                                              |
|---------------|--------------------------------------------------------------------------------------|
| insert_cat_fw | CCTGTTCCGGTCCTAATTACGTTATGCACACCAATGATGGCA<br>CCAAACACCCCCAAAAC                      |
| insert_cat_rv | TTATCGGTCTGGGGTTTACCGTCGGTCACAATGCTACGTTCA<br>CACAACCACACCACACCA                     |
| insert_kan_fw | GGTGCAGCGTAATCTTCCTCGTGCGGACCTATTAAGGGAAC<br>ACCAAACACCCCCAAAAC                      |
| insert_kan_rv | TTGCTGTTTGCATTGATTTATCAGGTATTGATCTACCGCCA<br>CACAACCACACCACACCA                      |
| insert_rif_fw | GGCATGTGACGTCAGCACCCAGTCATCACCCGTAGAAATGC<br>ACCAAACACCCCCAAAAC                      |
| insert_rif_rv | AGTAGGTTTTGCCCCGGAATAGAACCATTCTGTGGGCAGTTCA<br>CACAACCACACCACACCA                    |
| test_cat_fw   | CGCCTGTTCCGGTCCTAATT                                                                 |
| test_cat_rv   | GGGCTTTTGGCTTACGGTTG                                                                 |
| test_kan_fw   | CTGGAAAACGCCTCGCAAAA                                                                 |
| test_kan_rv   | TCCCATTACCATTCCCTCGCG                                                                |
| test_rif_fw   | AGGGGGCGTGATCCATTTTT                                                                 |
| test_rif_rv   | TTTCTGCTCAGCAACGTGAG                                                                 |
| ΔrelA_fw      | CTGGTTCAGCTTACCGAGCACCCGGCCCAGCACCTGCAGGC<br>ACCAGCTTTATTAATATGTGTGTAGGCTGGAGCTGCTTC |
| ΔrelA_rv      | ATGGTCGCGGTAAGAAGTGCACATATTAATAAAGCTGGTGC<br>CTGCAGGTGCTGGGCCGGGGTGTAGGCTGGAGCTGCTTC |
